# Supplementary material for: An evolutionary learning and network approach to identifying key metabolites for osteoarthritis
Source: PLOS journal article supplement (doi:10.1371/journal.pcbi.1005986), 2018-03-01

Nitro-Tyr (discovery)

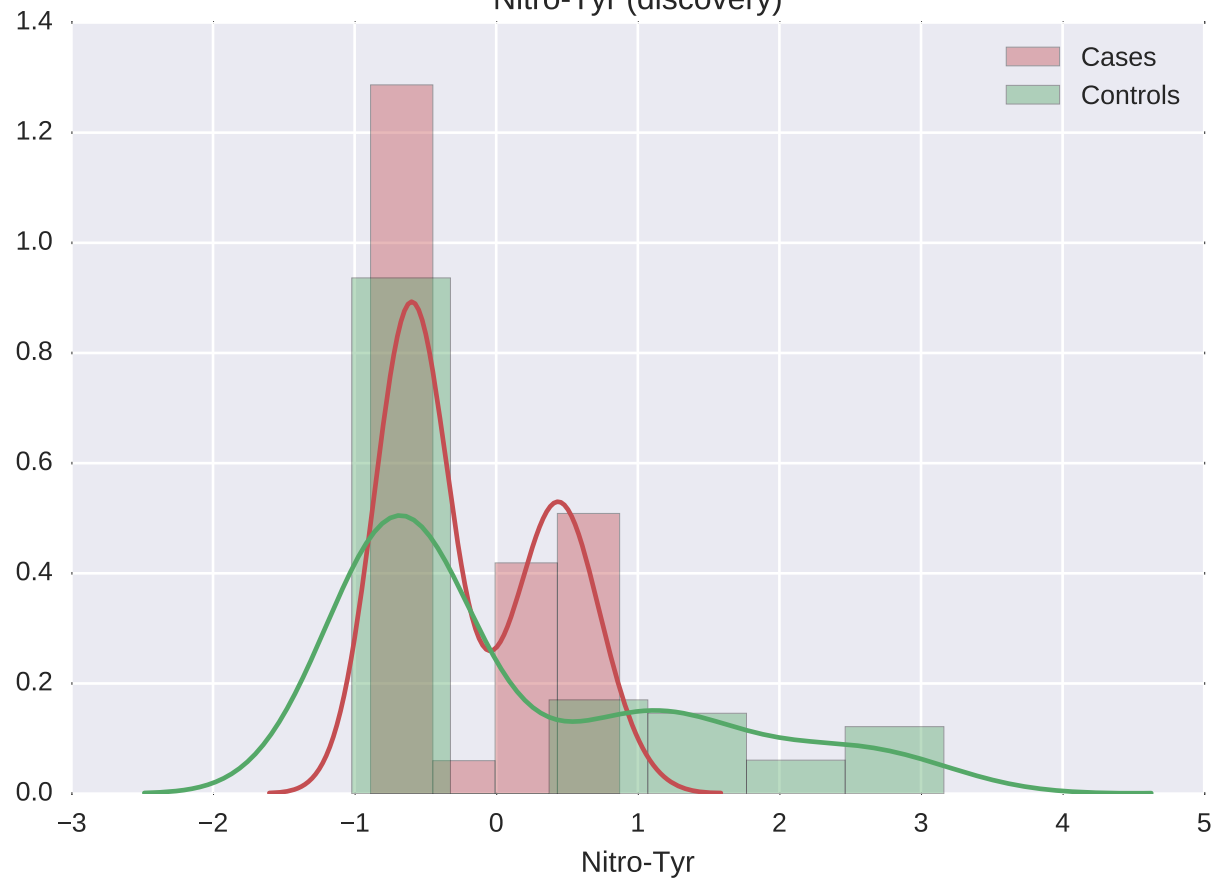

Nitro-Tyr (replication)

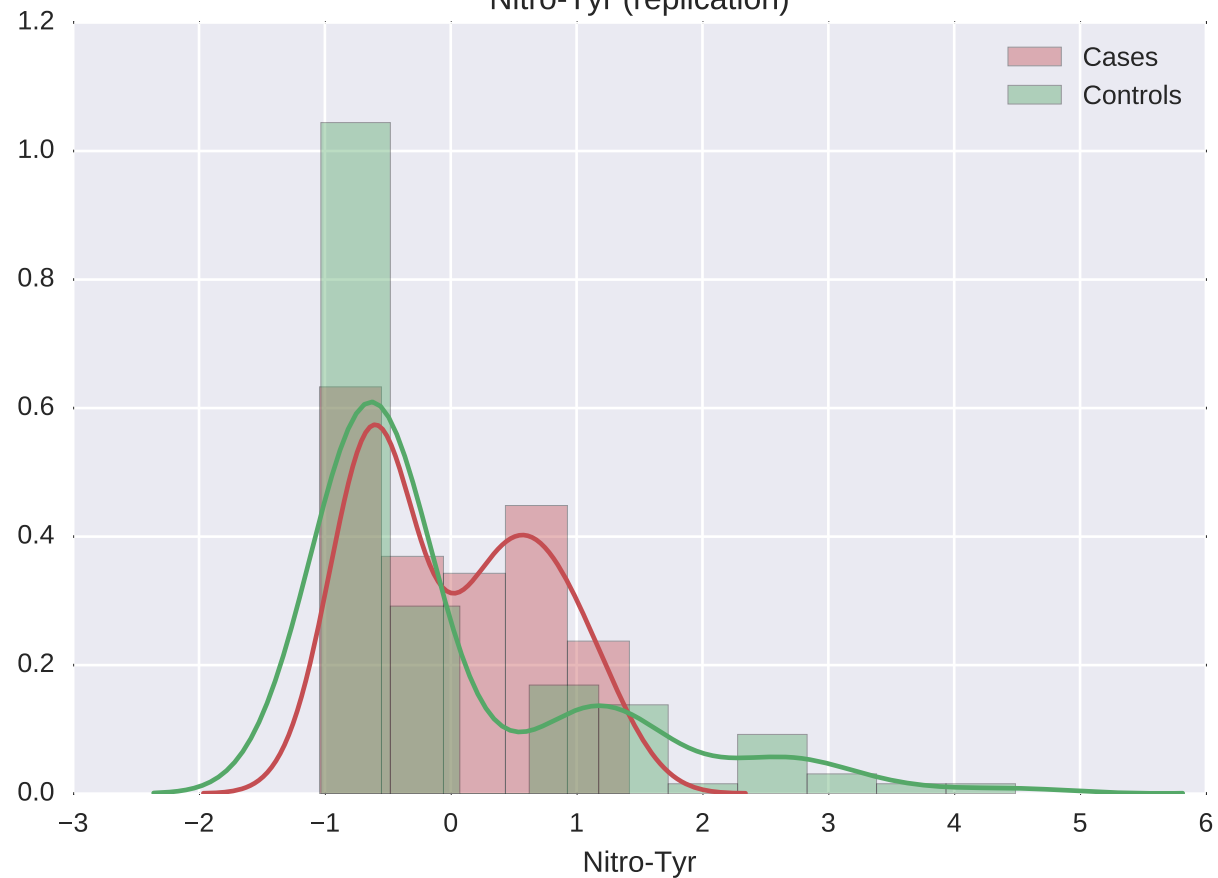

Supplement: S6 (10.1371/journal.pcbi.1005986.s006) [file journal.pcbi.1005986.s006]
